# Supplementary material
Source: MDPI journal article supplement (https://www.mdpi.com/2073-4395/14/1/1)
Supplement: s1 [file s1 › agronomy-2762817-supplementary.pdf]

Table S1. amount of irrigation water applied prior to the date of stem water potential ( $\Psi_{\text{stem}}$ ) measurement and number of days prior to stem water potential measurement date on which rainfall occurred, in both the irrigation seasons considered.

| <b>Date of irrigation event</b> | <b>Water Applied <math>\text{m}^3\text{ha}^{-1}</math></b> | <b>Date of SWP measurement</b> | <b>Irrigation event before <math>\Psi_{\text{stem}}</math> measurement (days)</b> | <b>Rain event before <math>\Psi_{\text{stem}}</math> measurements (days)</b> |
|---------------------------------|------------------------------------------------------------|--------------------------------|-----------------------------------------------------------------------------------|------------------------------------------------------------------------------|
| <b>07/06/21</b>                 | 55                                                         | <b>08/06/21</b>                | 1                                                                                 | 7                                                                            |
| <b>27/07/21</b>                 | 53                                                         | <b>28/07/21</b>                | 1                                                                                 | 10                                                                           |
| <b>17/08/21</b>                 | 55                                                         | <b>19/08/21</b>                | 2                                                                                 | 32                                                                           |
| <b>15/10/21</b>                 | 51                                                         | <b>18/10/21</b>                | 3                                                                                 | 8                                                                            |
| <b>14/06/22</b>                 | 51                                                         | <b>15/06/22</b>                | 1                                                                                 | 5                                                                            |
| <b>22/07/22</b>                 | 54                                                         | <b>25/07/22</b>                | 3                                                                                 | 12                                                                           |
| <b>28/08/22</b>                 | 55                                                         | <b>29/08/22</b>                | 1                                                                                 | 4                                                                            |
| <b>12/10/22</b>                 | 50                                                         | <b>13/10/22</b>                | 1                                                                                 | 3                                                                            |

Table S2. Monthly irrigation water applied and monthly rainfall in both the irrigation seasons considered.

|                     | <b>Monthly irrigation volume (<math>\text{m}^3</math>)</b> |             | <b>Monthly rainfall (mm)</b> |             |
|---------------------|------------------------------------------------------------|-------------|------------------------------|-------------|
|                     | <b>2021</b>                                                | <b>2022</b> | <b>2021</b>                  | <b>2022</b> |
| <b>June</b>         | 214                                                        | 296         | 10.01                        | 18.99       |
| <b>July</b>         | 206                                                        | 338         | 6.42                         | 9.43        |
| <b>August</b>       | 170                                                        | 305         | 19.59                        | 20.48       |
| <b>September</b>    | 126                                                        | 247         | 53.28                        | 80.03       |
| <b>October</b>      | 83                                                         | 125         | 115.56                       | 45.64       |
| <b>Total amount</b> | 799                                                        | 1311        | 204.83                       | 174.57      |

Table S3. amount of water applied per each date of irrigation during both the irrigation seasons considered.

| <b>2021</b>     | <b>m3/ha</b> | <b>2022</b>     | <b>m3/ha</b> |
|-----------------|--------------|-----------------|--------------|
| <b>01/06/21</b> | 40           | <b>04/06/22</b> | 43.00        |
| <b>07/06/21</b> | 42           | <b>07/06/22</b> | 44.00        |
| <b>14/06/21</b> | 43           | <b>14/06/22</b> | 41.00        |
| <b>22/06/21</b> | 41           | <b>18/06/22</b> | 41.00        |
| <b>30/06/21</b> | 48           | <b>21/06/22</b> | 44.00        |
| <b>05/07/21</b> | 42           | <b>24/06/22</b> | 43.00        |
| <b>12/07/21</b> | 41           | <b>28/06/22</b> | 40.00        |
| <b>19/07/21</b> | 41           | <b>01/07/22</b> | 42.00        |
| <b>27/07/21</b> | 40           | <b>05/07/22</b> | 43.00        |
| <b>31/07/21</b> | 42           | <b>08/07/22</b> | 41.00        |
| <b>11/08/21</b> | 43           | <b>14/07/22</b> | 43.00        |
| <b>17/08/21</b> | 41           | <b>19/07/22</b> | 44.00        |
| <b>21/08/21</b> | 44           | <b>22/07/22</b> | 41.00        |
| <b>31/08/21</b> | 42           | <b>26/07/22</b> | 44.00        |
| <b>04/09/21</b> | 41           | <b>29/07/22</b> | 40.00        |
| <b>21/09/21</b> | 43           | <b>03/08/22</b> | 45.00        |
| <b>30/09/21</b> | 42           | <b>06/08/22</b> | 45.00        |
| <b>09/10/21</b> | 42           | <b>10/08/22</b> | 45.00        |
| <b>15/10/21</b> | 41           | <b>14/08/22</b> | 45.00        |
| <b>Total</b>    | 799          | <b>18/08/22</b> | 42.00        |
|                 |              | <b>24/08/22</b> | 41.00        |
|                 |              | <b>28/08/22</b> | 42.00        |
|                 |              | <b>04/09/22</b> | 41.00        |
|                 |              | <b>10/09/22</b> | 40.00        |
|                 |              | <b>14/09/22</b> | 42.00        |
|                 |              | <b>20/09/22</b> | 41.00        |
|                 |              | <b>24/09/22</b> | 41.00        |
|                 |              | <b>29/09/22</b> | 42.00        |
|                 |              | <b>04/10/22</b> | 42.00        |

|  |                 |                |
|--|-----------------|----------------|
|  | <b>09/10/22</b> | <b>42.00</b>   |
|  | <b>12/10/22</b> | <b>41.00</b>   |
|  | <b>Total</b>    | <b>1311.00</b> |

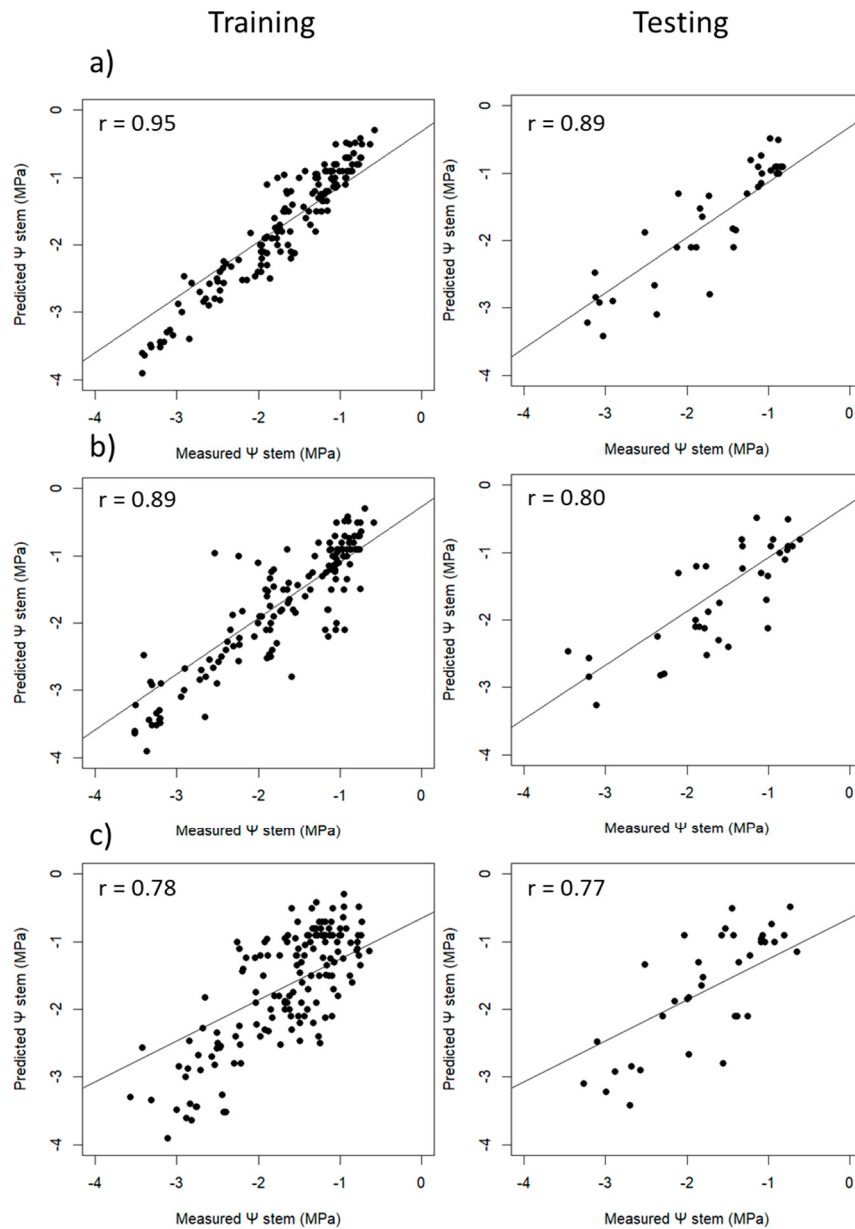

Figure S1: Pearson's correlation between measured and predicted  $\Psi_{\text{stem}}$  using the random forest-based model (a), support vector machine (b) and linear model (c) with Planet spectral bands as predictors.

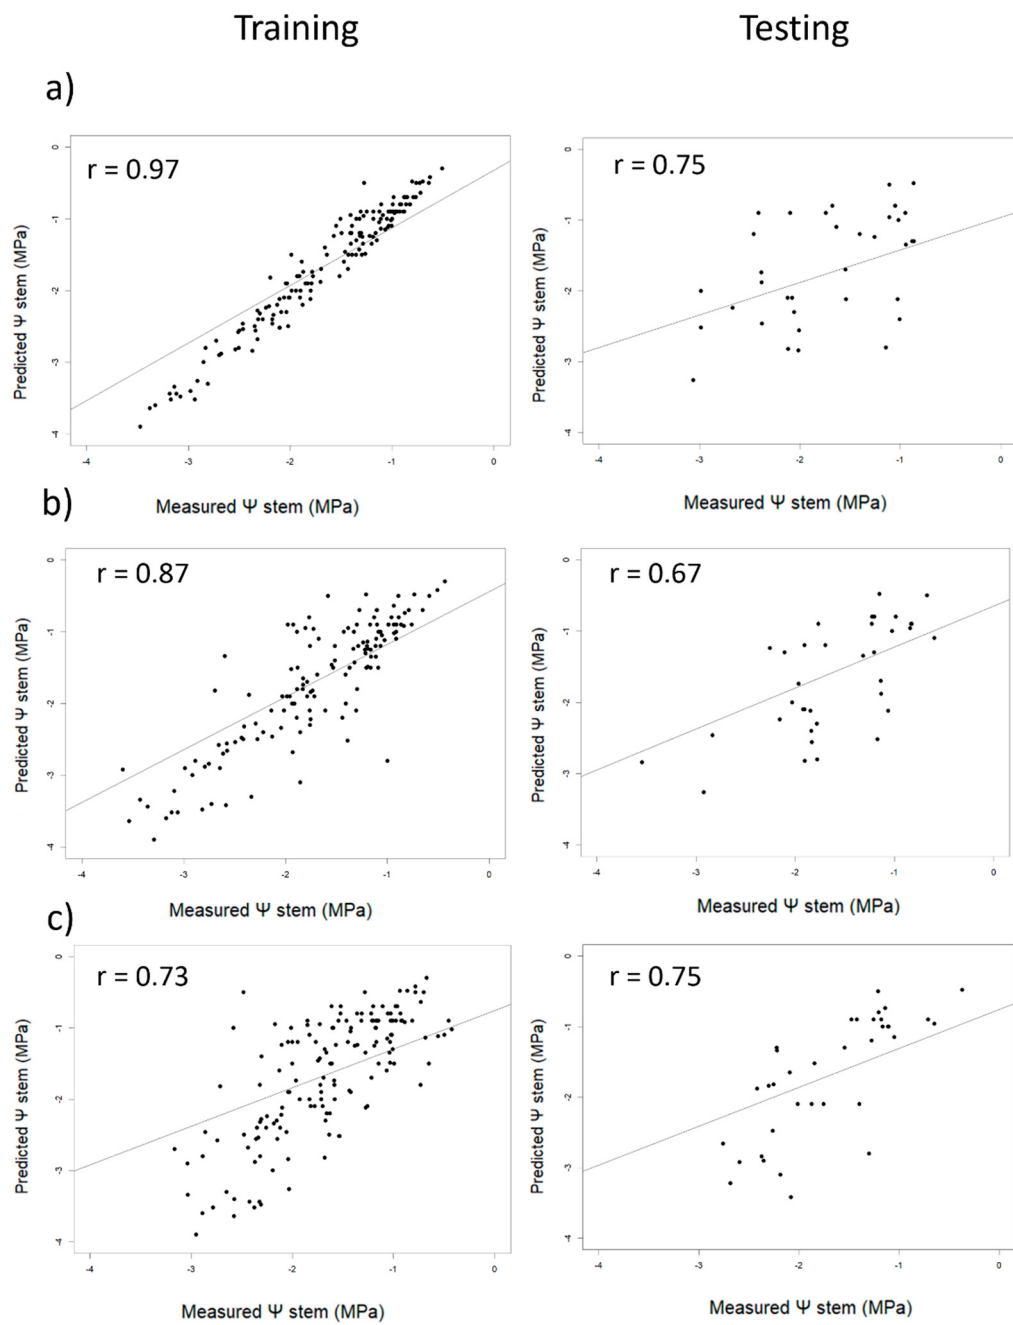

Figure S2: Pearson's correlation between measured and predicted  $\Psi_{\text{stem}}$  using the random forest-based model (a), support vector machine (b) and linear model (c) with vegetation indices as predictors.
